# Supplementary material
Source: PubMed Central journal article supplement (PMC5685169)
Supplement: NIHMS876813-supplement-Supp_Table_1.pdf [file NIHMS876813-supplement-Supp_Table_1.pdf]

Supplementary Table 1. An incomplete but illustrative list of free and well-supported tools for open science tools for neuroimaging. This table highlights analysis tools that can be scripted, allowing replicable analyses, as well as pipeline environments that bind together different software for replicable analyses, across heterogeneous software tools. The items under Data Sharing focus on tools to facilitate sharing and repositories that accept data. As repositories can have varying cost structures depending on the scale of data to be shared, we did not attempt to classify as “free” or not; likewise, repositories generally do not comprise software that need to be downloaded, and we likewise did not attempt to classify by open source nature of the project. Results sharing tools either facilitate sharing or serve as repositories for shared results data. The Reproducibility Tools are a loose collection of resources that facilitate research using open science methods.

| Resource           | Type                 | Short Description                                                           | Free       | Open Source | Link                                                                                                              |
|--------------------|----------------------|-----------------------------------------------------------------------------|------------|-------------|-------------------------------------------------------------------------------------------------------------------|
| Open Brain Consent | Consent              | Ethics template oriented for neuroimaging data sharing                      | x          | x           | <a href="http://open-brain-consent.readthedocs.io">http://open-brain-consent.readthedocs.io</a>                   |
| OpenSesame         | Paradigm software    | Graphical experiment builder                                                | x          | x           | <a href="http://osdoc.cogsci.nl">http://osdoc.cogsci.nl</a>                                                       |
| PsychoPy           | Paradigm software    | Psychophysics software in Python                                            | x          | x           | <a href="http://www.psychopy.org">http://www.psychopy.org</a>                                                     |
| Psychtoolbox       | Paradigm software    | Psychophysics Toolbox                                                       | x          | x           | <a href="http://psychtoolbox.org/">http://psychtoolbox.org/</a>                                                   |
| aa                 | Pipeline             | Automatic Analysis, Matlab-based workflow tool                              | x (Matlab) | x           | <a href="http://automaticanalysis.org">http://automaticanalysis.org</a>                                           |
| C-BRAIN            | Pipeline             | Web-based software for computationally intensive analyses                   | x          | x           | <a href="http://cbrain.mcgill.ca">http://cbrain.mcgill.ca</a>                                                     |
| CCS                | Pipeline             | Connectome Computation System, a pipeline primarily for resting data        | x          | x           | <a href="http://github.com/zuoxinian/CCS">http://github.com/zuoxinian/CCS</a>                                     |
| C-PAC              | Pipeline             | Configurable Pipeline for the Analysis of Connectomes                       | x          | x           | <a href="http://fcp-indi.github.io">http://fcp-indi.github.io</a>                                                 |
| DPARSF/DPABI       | Pipeline             | Data Processing & Analysis for Brain Imaging, including resting-state fMRI  | x          | x           | <a href="http://rfmri.org/dpabi">http://rfmri.org/dpabi</a>                                                       |
| DTIPrep            | Pipeline             | Pipeline for diffusion weighted / diffusion tensor image data               | x          | x           | <a href="http://www.nitrc.org/projects/dtiprep/">http://www.nitrc.org/projects/dtiprep/</a>                       |
| HCP Pipeline       | Pipeline             | Human Connectome Project Pipeline                                           | x          | x           | <a href="http://github.com/Washington-University/Pipelines">http://github.com/Washington-University/Pipelines</a> |
| LONI Pipeline      | Pipeline             | Cross-platform workflow tool for neuroimaging, genomics, bioinformatics     | NC         |             | <a href="http://pipeline.loni.usc.edu">http://pipeline.loni.usc.edu</a>                                           |
| LORIS              | Pipeline             | Web-based data and project management software for neuroimaging             | x          | x           | <a href="http://loris.ca">http://loris.ca</a>                                                                     |
| NIAC               | Pipeline             | Library of modules and pipelines for fMRI processing in Matlab/Octave       | x          | x           | <a href="http://www.nitrc.org/projects/niac">http://www.nitrc.org/projects/niac</a>                               |
| NiDB               | Pipeline             | Neuroimaging database software that includes pipeline tools                 | x          | x           | <a href="http://github.com/gbook/nidb">http://github.com/gbook/nidb</a>                                           |
| NiPype             | Pipeline             | Neuroimaging in Python Pipelines and Interfaces                             | x          | x           | <a href="http://nipy.org/nipype">http://nipy.org/nipype</a>                                                       |
| PANDA              | Pipeline             | Pipeline for Analyzing brain Diffusion images                               | x          | x           | <a href="http://www.nitrc.org/projects/panda">http://www.nitrc.org/projects/panda</a>                             |
| SimNIBS            | Pipeline             | Simulation of Non-invasive Brain Stimulation                                | x          | x           | <a href="http://simnibs.de">http://simnibs.de</a>                                                                 |
| AFNI               | Scriptable Analysis  | Neuroimaging analysis software for functional MRI                           | x          | x           | <a href="http://afni.nimh.nih.gov/afni">http://afni.nimh.nih.gov/afni</a>                                         |
| CONN               | Scriptable Analysis  | Functional connectivity toolbox, Matlab-based pipeline tool                 | x (Matlab) | x           | <a href="http://www.nitrc.org/projects/conn">http://www.nitrc.org/projects/conn</a>                               |
| Connectir          | Scriptable Analysis  | Analysis software for Connectome-Wide Association Studies, based in R       | x          | x           | <a href="http://czarrar.github.io/connectir">http://czarrar.github.io/connectir</a>                               |
| DiPy               | Scriptable Analysis  | Diffusion analysis pipeline using Python                                    | x          | x           | <a href="http://nipy.org/dipy">http://nipy.org/dipy</a>                                                           |
| Freesurfer         | Scriptable Analysis  | Neuroimaging analysis software for MRI, emphasis on surface-based analysis  | x          | x           | <a href="http://surfer.nmr.mgh.harvard.edu">http://surfer.nmr.mgh.harvard.edu</a>                                 |
| FSL                | Scriptable Analysis  | Neuroimaging analysis software for MRI                                      | NC         | x           | <a href="http://www.fmrib.ox.ac.uk/fsl">http://www.fmrib.ox.ac.uk/fsl</a>                                         |
| MindBoggle         | Scriptable Analysis  | Automated labeling and shape analysis of brain images                       | x          | x           | <a href="http://www.mindboggle.info">http://www.mindboggle.info</a>                                               |
| SPM                | Scriptable Analysis  | Neuroimaging analysis software based in Matlab, for MRI, M/EEG, PET.        | x (Matlab) | x           | <a href="http://www.fil.ion.ucl.ac.uk/spm">http://www.fil.ion.ucl.ac.uk/spm</a>                                   |
| Voxel              | Scriptable Analysis  | Mass-Univariate Voxelwise Analysis of Medical Imaging Data, based in R      | x          | x           | <a href="http://cran.r-project.org/web/packages/voxel">http://cran.r-project.org/web/packages/voxel</a>           |
| BIDS               | Data Sharing         | Standard for organising MRI data and associated supporting data             |            |             | <a href="http://bids.neuroimaging.io">http://bids.neuroimaging.io</a>                                             |
| COINS              | Data Sharing         | Web-based data management and analysis tool                                 |            |             | <a href="http://coins.mrn.org">http://coins.mrn.org</a>                                                           |
| FCP/INDI           | Data Sharing         | Repository for resting state fMRI data                                      |            |             | <a href="http://fcon_1000.projects.nitrc.org">http://fcon_1000.projects.nitrc.org</a>                             |
| Figshare           | Data Sharing         | Generic data sharing repository                                             |            |             | <a href="http://figshare.com">http://figshare.com</a>                                                             |
| LONI IDA           | Data Sharing         | Image data archive, repository for primarily neuroimaging data              |            |             | <a href="http://ida.loni.usc.edu">http://ida.loni.usc.edu</a>                                                     |
| LORIS              | Data Sharing         | Database for longitudinal imaging studies                                   |            |             | <a href="http://bigbrain.loris.ca">http://bigbrain.loris.ca</a>                                                   |
| NDA                | Data Sharing         | NIMH Data Archive, repository for data from NIMH-funded studies             |            |             | <a href="http://data-archive.nimh.nih.gov">http://data-archive.nimh.nih.gov</a>                                   |
| NITRC-IR           | Data Sharing         | Image repository for neuroimaging data                                      |            |             | <a href="http://www.nitrc.org/ir">http://www.nitrc.org/ir</a>                                                     |
| OpenfMRI           | Data Sharing         | Repository for task fMRI data, including all image and task paradigm data   |            |             | <a href="https://openfmri.org">https://openfmri.org</a>                                                           |
| PCP                | Data Sharing         | Preprocessed connectome project - pipelines for resting state data          |            |             | <a href="http://preprocessed-connectomes-project.org">http://preprocessed-connectomes-project.org</a>             |
| XNAT-Central       | Data Sharing         | Repository for raw MRI data                                                 |            |             | <a href="http://central.xnat.org">http://central.xnat.org</a>                                                     |
| BALSA              | Results Sharing      | Sharing of surface-based statistical results                                | x          |             | <a href="http://balsa.wustl.edu">http://balsa.wustl.edu</a>                                                       |
| NeuroVault         | Results Sharing      | Sharing tool for statistical maps                                           | x          | x           | <a href="http://neurovault.org">http://neurovault.org</a>                                                         |
| NIDM               | Results Sharing      | Standard for exporting statistical results independent of the analysis tool | x          | x           | <a href="http://nidm.nidash.org">http://nidm.nidash.org</a>                                                       |
| Docker             | Reproducibility tool | Containerisation tool                                                       | x          | x           | <a href="http://www.docker.com">http://www.docker.com</a>                                                         |
| GitHub             | Reproducibility tool | Version and issue tracking for software projects                            | x          | x           | <a href="http://github.org">http://github.org</a>                                                                 |

| Resource    | Type                 | Short Description                                                   | Free | Open Source | Link                                                          |
|-------------|----------------------|---------------------------------------------------------------------|------|-------------|---------------------------------------------------------------|
| NeuroDebian | Reproducibility tool | Archive of research software packages for use on workstations & VMs | x    | x           | <a href="http://neuro.debian.net">http://neuro.debian.net</a> |
